# Supplementary material
Source: Springer Nature journal article supplement (https://www.springermedizin.de/resource/supplementary/12955_2007_387_MOESM4_ESM.pdf/9560294)
Supplement: MOESM4 [file 9560294]

**SF-36 Scores – Absolute Mean Values  
PBO-Treated ITT subjects (N = 372)**

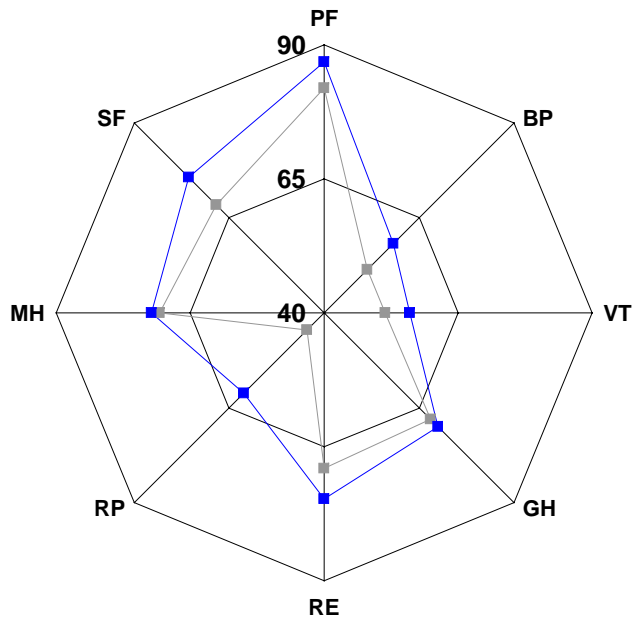

■ Baseline (n = 340-345) ■ Week 26 (n = 224-228)

**SF-36 Scores – Absolute Mean Values  
TPM 100 mg/d-Treated ITT subjects (N = 384)**

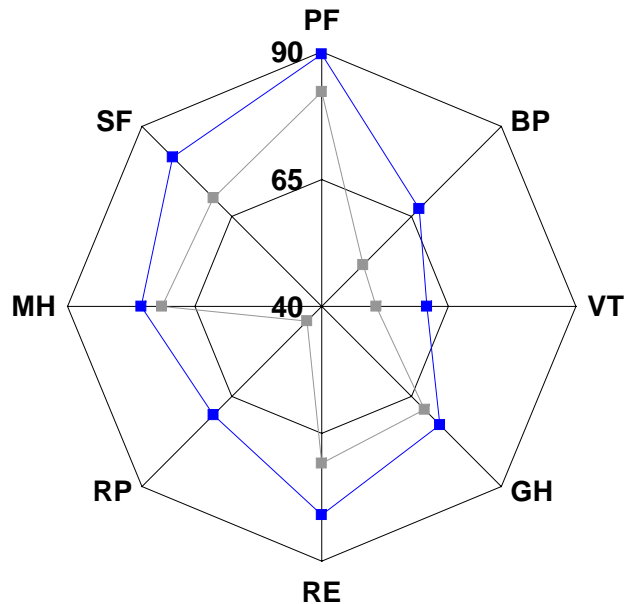

■ Baseline (n = 351-356) ■ Week 26 (n = 227-229)
